# Supplementary material for: Biologically meaningful moonlight measures and their application in ecological research
Source: Springer Nature journal article supplement (doi:10.1007/s00265-022-03287-2), 2023-02-01
Supplement: 265_2022_3287_MOESM1_ESM.pdf [file 265_2022_3287_MOESM1_ESM.pdf]

**Article title:** Biologically meaningful moonlight measures and their application in ecological research

**Journal name:** Behavioral Ecology and Sociobiology

**Authors details:**

Śmielak, Michał Krzysztof

Ecosystem Management, School of Environmental and Rural Science, University of New England, Armidale, New South Wales 2351, Australia.

ORCID: 0000-0002-3585-9945

email: msmielak@myune.edu.au

## Details of custom moonlight logger construction

The custom light logger was based on a TGP-4703 TinyTag Plus 2 voltage logger (Gemini Data Loggers, Chichester, United Kingdom), a light-dependent resistor (LDR), and a fixed resistor (Fig. 1). LDR was encapsulated in clear epoxy to increase the field-of-view of the resistor to 180 degrees (Fig. 2).

LDR (also known as photoresistor or photocell) is a passive component that decreases resistance when illuminated. When combined with a pull-down resistor to form a voltage divider, voltage drop across the LDR ( $V_{out}$ ) can be measured. This particular logger provides 3.3V voltage to the sensor through the sense line and can read and record values between 0 and 2.5V. As illuminance increases, the resistance of the circuit drops, and therefore measured voltage increases up to 2.5V when the logger is “saturated”, therefore above a certain illumination level only a “bright” state is recorded, and light levels are no longer measured.

A CdS Photoconductive Photocell, model PDV-P8001 (Advanced Photonix, Camarillo, United States) was used which has a typical resistance of  $>0.2\text{ M}\Omega$  at millilux light levels and approximately  $70\text{ K}\Omega$  at 1 lux. A resistor with an appropriate value (in this case  $220\text{ K}\Omega$ ) was used to build a voltage divider circuit so that the logger would read values from approximately 0.5 V without light to approximately 2.5 V at 1 lux. It is worth noting that due to tolerances of both LDR and pull-down resistor, other resistance values might be required and need to be empirically tested even if the same LDR model is used.

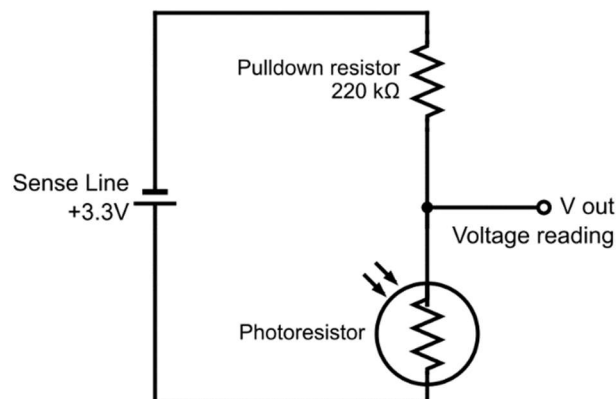

*Fig. 1* Diagram for the voltage divider circuit used to measure moonlight intensity

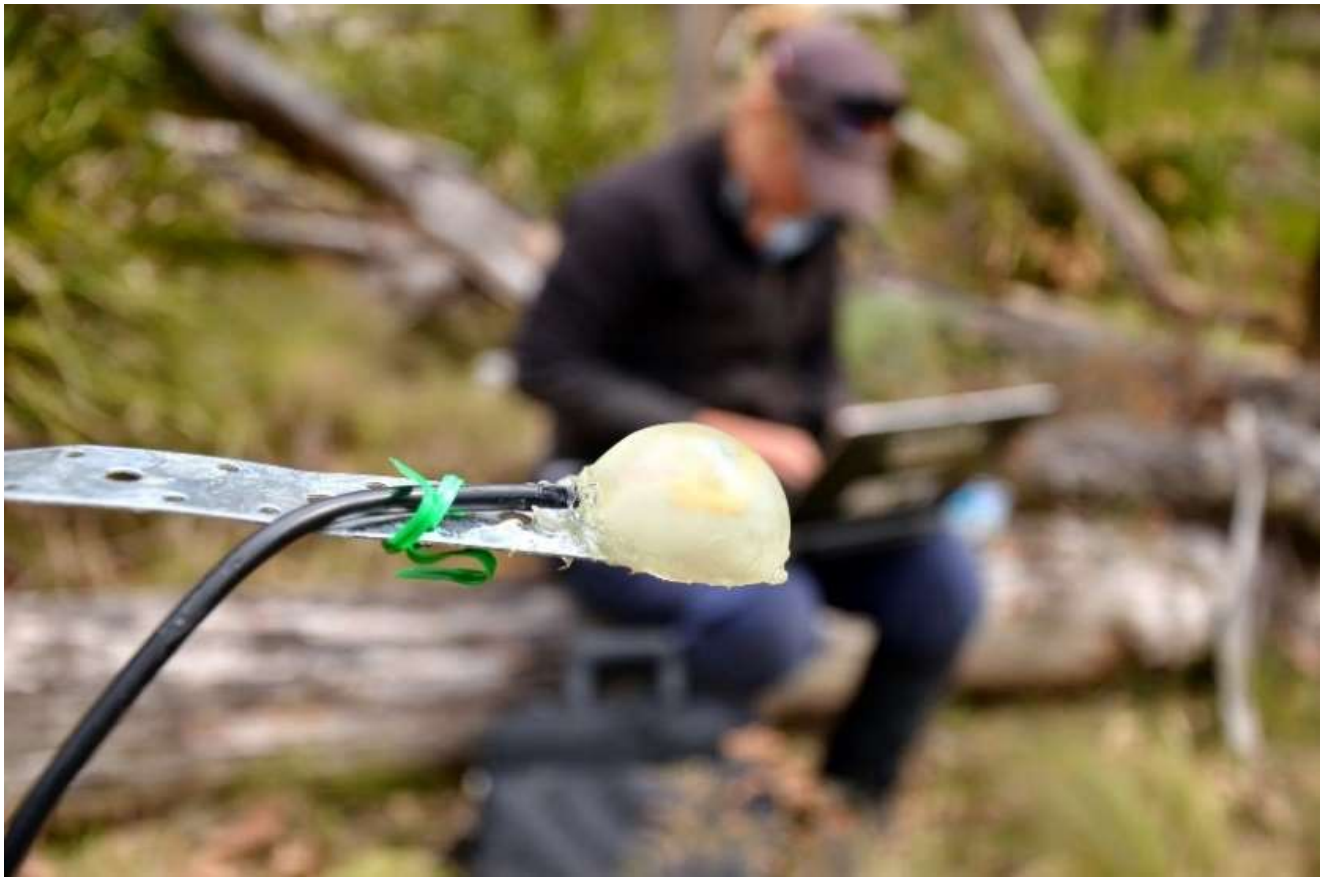

*Fig. 2 Photoresistor encapsulated in a clear epoxy dome and mounted in the field on a metal bracket*
